# Supplementary material for: Characterization of Mitochondrial Proteome and Function in Luminal A and Basal-like Breast Cancer Subtypes Reveals Alteration in Mitochondrial Dynamics and Bioenergetics Relevant to Their Diagnosis
Source: MDPI journal article supplement (doi:10.3390/biom12030379), 2022-02-28
Supplement: s1 [file s1]

# **Supplementary figures to**

## **Characterization of mitochondrial proteome and function in luminal A and basal-like breast cancer subtypes reveals alteration in mitochondrial dynamics and bioenergetics relevant to their diagnosis**

Ariadna Jazmín Ortega-Lozano <sup>1</sup>, Leopoldo Gómez-Caudillo <sup>1</sup>, Alfredo Briones-Herrera <sup>1</sup>, Omar Emiliano Aparicio-Trejo <sup>2</sup> and José Pedraza-Chaverri <sup>1,\*</sup>

<sup>1</sup> Department of Biology, Faculty of Chemistry, National Autonomous University of Mexico (UNAM), Mexico City 04510, Mexico; arijol-sk@hotmail.com (A.J.O.-L); pologoca@gmail.com (L.G.-C); bhalfredo@gmail.com (A.B.H).

<sup>2</sup> Department of Cardio-Renal Physiopathology, National Institute of Cardiology "Ignacio Chávez", Mexico City 14080, Mexico; emilianoaparicio91@gmail.com (O.E.A.-T.).

\* Correspondence: pedraza@unam.mx; Tel./Fax: +52-55-5622-3878

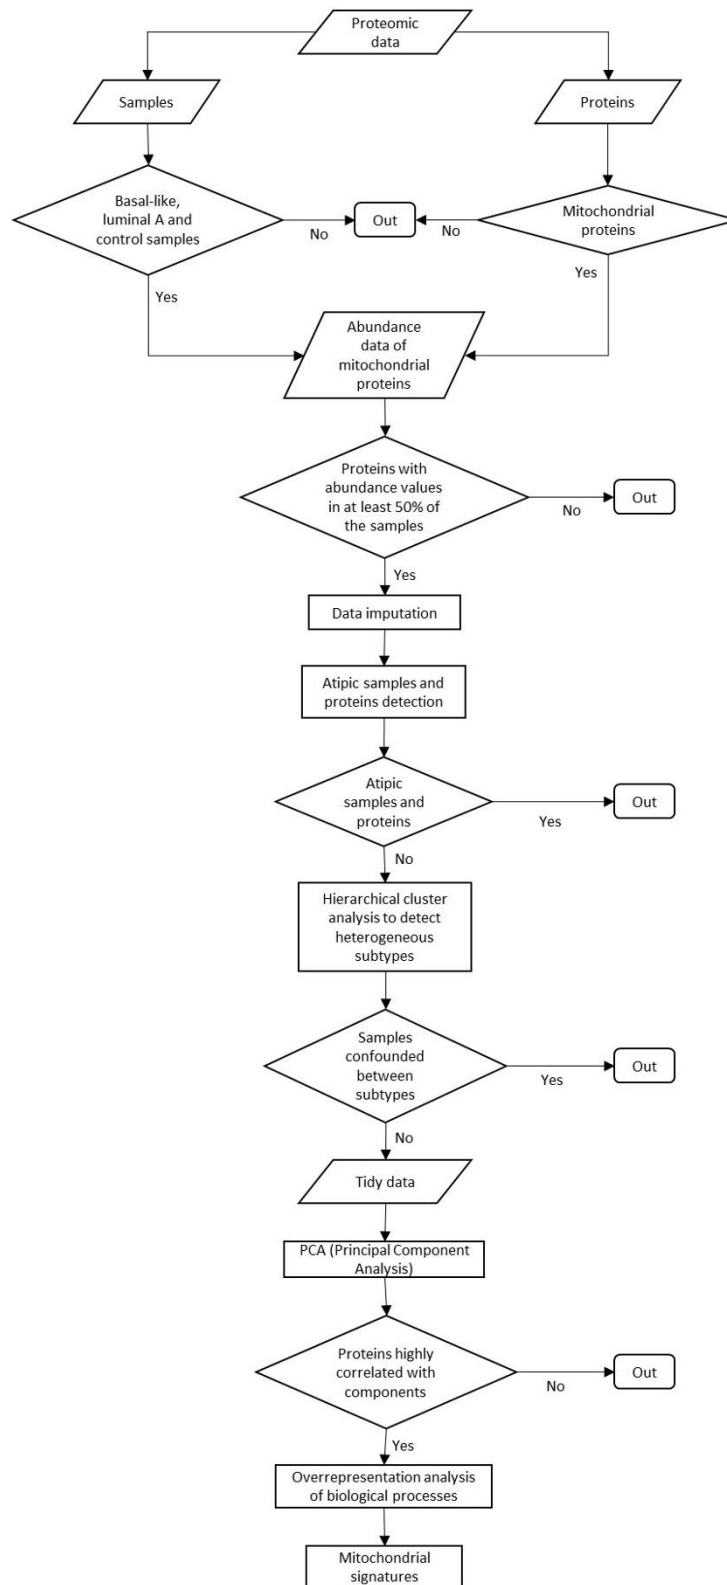

Figure S1. Flow chart of the statistical and bioinformatic analysis process of proteomic data of breast cancer tumors.

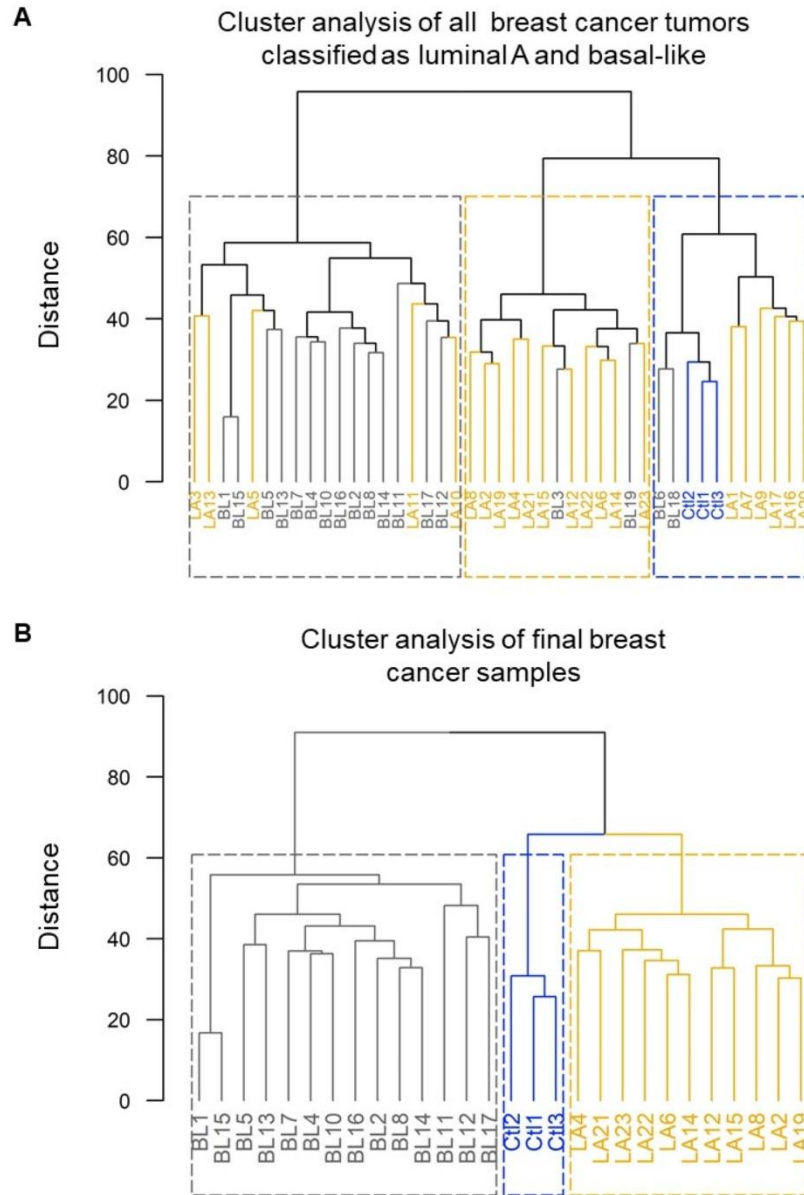

**Figure S2. Hierarchical cluster analysis.** (A) Hierarchical analysis with 3 control samples (Ctl), 22 luminal A (LA) breast cancer samples and 18 basal-likes (BL) breast cancer samples, in which it is observed that despite the molecular classification of breast cancer patients, there are 10 luminal A samples and 4 basal-like samples that confuse with other molecular subtypes. (B) Elimination of the 14 breast cancer tumors, obtaining homogeneous groups for the luminal A and basal-like subtypes of breast cancer.
